## Human IgG cell neutralizing monoclonal antibodies block SARS-CoV-2 infection

Jinkai Wan<sup>1#</sup>, Shenghui Xing<sup>1#</sup>, Longfei Ding<sup>2#</sup>, Yongheng Wang<sup>4#</sup>, Dandan Zhu<sup>5</sup>, Bowen Rong<sup>1</sup>, Siqing Wang<sup>1</sup>, Kun Chen<sup>1</sup>, Chenxi He<sup>1</sup>, Songhua Yuan<sup>2</sup>, Chengli Qiu<sup>2</sup>, Chen Zhao<sup>2</sup>, Xiaoyan Zhang<sup>3</sup>, Xiangxi Wang<sup>5</sup>, Yanan Lu<sup>4\*</sup>, Jianqing Xu<sup>3\*</sup>, Fei Lan<sup>1\*</sup>.

<sup>1</sup>Shanghai Key Laboratory of Medical Epigenetics, International Co-laboratory of Medical Epigenetics and Metabolism, Ministry of Science and Technology, Institutes of Biomedical Sciences, Fudan University, and Key Laboratory of Carcinogenesis and Cancer Invasion, Ministry of Education, Liver Cancer Institute, Zhongshan Hospital, Fudan University, Shanghai 200032, China;

<sup>2</sup>Shanghai Public Health Clinical Center, Fudan University, Shanghai 201508, China;

<sup>3</sup>Shanghai Public Health Clinical Center & Institutes of Biomedical Sciences, Fudan University, Shanghai, 201508, China;

<sup>4</sup>Active Motif China Shanghai, 201315, China;

<sup>5</sup>National Laboratory of Macromolecules, Institute of Biophysics, Chinese Academy of Sciences, Beijing, 100101, China;

#These authors contributed equally.

\*Correspondence: Fei Lan (fei\_lan@fudan.edu.cn), Jianqing Xu (xujianqing@shphc.org.cn), Yanan Lu (ylu@activemotif.com)

### Abstract

The coronavirus induced disease 19 (COVID-19) caused by the severe acute respiratory syndrome coronavirus 2 (SARS-CoV-2) has become a worldwide threat to human lives, and neutralization antibodies present a great therapeutic potential in curing affected patients. We purified more than one thousand memory B cells specific to SARS-CoV-2 recombinant S1 or RBD antigens from 11 convalescent COVID-19 patients, and a total of 729 naturally paired heavy and light chain fragments were obtained by single B cell cloning technology. Among these, 178 recombinant monoclonal antibodies were tested positive for antigen binding, and 17 strong binders to S1 or RBD were identified with  $K_d$  (EC50) below 1 nM. Importantly, 12 antibodies could block pseudoviral entry into HEK293T cells overexpressing ACE2, with the best

ones showing IC<sub>50</sub> around 2-3 nM. We then tested all these 12 antibodies in authentic virus infection assay, and found 414-1 was able to effectively block live viral entry with IC<sub>50</sub> at 1.75 nM and in combination with 105-38 could achieve IC<sub>50</sub> as low as 0.45 nM. Interestingly, we also found 3 antibodies crossreacting with the SARS-CoV spike protein, and one of them, 515-5, could block SARS-CoV pseudovirus infection. Altogether, our study provided potent neutralization antibodies as clinical therapeutics candidates for further development.

## Introduction

Over the last two decades in 21st century, the outbreaks of several viral infectious diseases affected millions of people<sup>1-7</sup>. Among these, 3 coronaviruses, SARS-CoV, MERS and SARS-CoV-2<sup>8</sup>, have received significant attention due to current outbreak of COVID-19 caused by SARS-CoV-2, and high mortality rates of the infected individuals. Most patients died due to severe pneumonia and multi-organ failure<sup>4,9</sup>. Despite of rare exceptions, such as asymptomatic carriers, exist, it is generally believed if the infected individuals could not develop effective adaptive immune responses for viral clearance to prevent sustained infection, there are high chances for transformation into severe acute respiratory infection. Supporting this idea, treatment with convalescent plasma to COVID-19 patients showed significant clinical improvement and decreased viral load within days<sup>10</sup>. However, the sources of convalescent plasma are limited and could not be amplified, therefore, effective and scalable treatments are still urgently needed<sup>11</sup>.

Recently, owing to rapid development of single cell cloning technology, the process of antibody identification has been much shortened, from years to even less than 1 month. Therefore, full human and humanized neutralization antibodies represent as great hopes for a prompt development of therapeutics in treating infectious diseases. In support of this, cocktail treatment of 3 mixed antibodies recognizing different epitopes, with one of them able to neutralize, was successfully used in the curation of a British Ebola patient (Role of the Ebola membrane in the protection conferred by the three-mAb cocktail MIL77<sup>12</sup>). Regarding coronaviruses, neutralization antibodies against MERS were tested effective in animals<sup>13</sup>. While SARS-CoV neutralization antibodies did not meet human due to lack of patients after development, one of them, CR3022, was shown to be able to cross-react with and to weakly neutralize

SARS-CoV-2<sup>14</sup>. However, the RBD regions (key targets for viral neutralization) only share 74% sequence identity between the two SARS viruses<sup>15</sup>, raising concerns about the effectiveness of SARS-CoV neutralization antibodies against SARS-CoV-2.

The spike proteins of coronaviruses play essential role in viral entry to human target cells. The S1 region, especially the RBD domain, primes the viral particle to human cell surface through the interaction with the receptor protein Angiotensin I Converting Enzyme 2 (ACE2)<sup>16</sup>, which then triggers infusion process primarily mediated by S2 region<sup>17</sup>. The primary amino acid sequences of the spike proteins of SARS-CoV and SARS-CoV-2 share 76 % identity throughout the full coding regions, with 79.59 % similarity and 74% identity in RBD domains<sup>14,15,18</sup>. Structure analyses revealed high similarity between the spike proteins of the two viruses, and both form trimerization and interact with ACE2 through the RBD domains<sup>19</sup>. In addition, recent research reported that it is difficult to distinguish exposure to SARS-CoV-2 from SARS-CoV in serological studies using S ectodomain trimer, and they elicit neutralizing antibodies against SARS-CoV-2 from SARS-CoV<sup>15</sup>. Importantly, the interaction between the SARS-CoV-2 RBD and ACE2 was assessed at around 1.2 nM<sup>17,20</sup>, 4 folds stronger than the SARS-CoV RBD. While this enhanced affinity may explain a much stronger spreading ability of SARS-CoV-2, it also suggests that finding potent neutralization antibodies targeting SARS-CoV-2 RBD could also be more challenging.

While this manuscript was under preparation, human neutralizing monoclonal antibodies have been reported by a few studies<sup>21-25</sup>. While these groups and ours all employed similar approaches and obtained live viral neutralization antibodies, the performances of these antibodies displayed large differences in various assays, i.e. binding affinity, pseudoviral neutralization abilities. Nevertheless, more human antibodies could either directly neutralize SARS-CoV-2 entry to human cells or opsonize free viral particles for rapid immune clearances are still needed.

Here, we report the identification of 178 S1 and RBD binding full human monoclonal antibodies from the memory B cells of 11 recently recovered patients. The CDR3 sequences of the majority of these antibodies are different, indicating they are developed from different B cell clones. Among the stronger binders, we found 28 RBD binders and 7 non-RBD binders. A total of 17 antibodies showed binding

affinities lower than 1 nM, and 12 antibodies showed robust neutralization ability of pseudoviruses with the best one 414-1 showing IC<sub>50</sub> at 1.75 nM. Importantly, 6 antibodies showed IC<sub>50</sub> below 10nM in blocking live viral infection. Moreover, among the 24 best binders, we found 3 antibodies could cross-react with SARS-CoV spike protein with similar affinity, and one of these, 515-5, could also neutralize SARS-CoV pseudoviral infection.

## Results

### Serologic Responses and single B cell isolation

We screened 11 patients recently recovered from COVID-19, and identified 9 out of 11 individuals with strong serological responses to SARS-CoV-2 Spike RBD and S1 protein (Figure 1 A and 1B), and 7 sera showed neutralization abilities for pseudoviral infection of HEK293T cells stably expressing human ACE2 (Figure 1B). We also noticed that sera from different individuals displayed a wide range of antibody responses to SARS-CoV-2 infection in our assays.

The RBD domain in S1 region of SARS-Cov-2 spike protein is the critical region that mediates viral entry through host receptor ACE2. Using recombinant viral antigens, we then isolated RBD and S1 binding memory B cells for antibody identification from 11 individuals by flow cytometry based sorting technology (Figure 1A). Each individual exhibited different frequencies of viral antigen specific memory B cells (Figure 1C and Table S1).

Sequences encoding antibody heavy (IGH) and light (IGL) chains were amplified from single B cell cDNAs after reverse transcription and then cloned through homologous recombination into mammalian expressing vectors<sup>26</sup>. Overall, 729 naturally paired antibody genes were obtained from the 11 individuals, of which the No.71 individual failed to give any positive antibody. However, no strong correlation was found between sera binding capacity and the number of acquired SARS-CoV-2 S-specific antibodies (Figure 1B and Table S1). Unlike other samples, No.509 blood sample was obtained at the second day after hospitalizing (Table S2), but the sera already had certain but weak S-specific affinity and pseudoviral neutralizing capacity, and we did not obtain any strong antibodies from No.509 sample.

## Identification and affinity characterization of human monoclonal antibodies to SARS-CoV-2

All the 729 antibodies were further expressed in HEK293E cells and the supernatants were tested in ELISA for S1 or RBD binding (Figure 2C, Figure S1). Among these, 178 antibody supernatants showed RBD or S1 binding positivity. We then purify all these antibodies in larger quantities to measure the precise values of  $K_d$  (EC50), and found the values varied broadly, with the most potent one at 57 pM (8.55 pg/ $\mu$ l), and 17 strongest ones having  $K_d$  (EC50) below 1 nM (Figure 3A). All the positive clones were then sequenced. Notably, most (98.6%) of the sequences obtained were unique ones (Figure 1D), unlikely what were previously reported for HIV-1, influenza and ZIKV<sup>26</sup>.

As the spike S1 protein of SARS-CoV-2 tends to undergo conformation changes during storage, we also performed flow cytometry analyses for all 729 purified antibodies or supernatants for the binding ability of the freshly expressed spike protein in the membrane bound form using HEK293T cells (Figure 2B). Among these 729 antibodies, 58 were obtained from B cells purified by recombinant RBD domain, and 671 were from B cells purified by recombinant S1 protein. From the latter, only 21 were able to bind S-ECD while showed low or no RBD affinity, tested by ELISA. The result indicates that RBD regions are the primary antigen inducing antibody generation and recognition (Figure 2C).

We also found that the results from the flow cytometry and ELISA assays were largely consist among the top 17 antibodies ( $K_d < 1$  nM) detected by ELISA, only two could not bind SARS-CoV-2 Spike protein on cell membrane by flow cytometry (Figure 3A). However, 5 of 11 less strong antibodies (EC50 between 1-20nM) could only bind cell membrane S protein (Figure 2D), indicating that the membrane-bound and soluble recombinant S proteins might have certain conformation alterations.

## Identification of potent neutralizing antibodies by pseudoviral and live viral infection assays

To identify neutralization antibodies, we first employed pseudoviral infection assays using HEK293T-ACE2 cells and screened 135 antibodies. From all the antibodies tested, we found a total of 12 pseudoviral neutralization antibodies, with IC<sub>50</sub> from 2.3 – 50 nM. The best 3 antibodies in neutralizing pseudoviruses are 414-1, 505-3 and 553-63 (Figure 3B, IC<sub>50</sub> from 2.3 to 3.6 nM), all of which also showed strong affinities towards RBD domain (Figure 2A, K<sub>d</sub> from 0.079 nM to 0.31 nM) to the receptor binding domain (RBD) of Spike (S) protein, indicating certain level of correlation between the two abilities. Subsequently 414-1 was tested in pH5.0 binding buffer by ELISA (Figure S4), the result showed a good affinity performance of 414-1 in low pH which indicating less probability in causing ADE. To our surprise, two of the 12, 413-2 and 505-8, did not recognize RBD domain in ELISA, but were able to robustly recognize membrane-bound S protein overexpressing in HEK293T cells, indicating there is an alternative neutralization mechanism of non-RBD binders.

Among the 12 pseudoviral neutralization antibodies, only 414-4 cannot bind S protein expressed in cell membrane detected by flow cytometry analysis, and all of those 11 neutralization antibodies could be competed by 50nM ACE2 (Figure S2) However, the affinity of antibodies binding S protein have no significant correlation with neutralization ability, for example, 414-1, 505-3 and 553-63 with the strongest neutralizing activity can be completed by 5, 50, 500 times higher concentration of ACE2, respectively (Figure 3C, Figure S3)

We then performed live viral neutralization assay of all 12 pseudoviral antibodies in Vero-E6 overexpressing human ACE2, and found 414-1 was able to effectively block live viral entry with IC<sub>50</sub> at 1.75 nM and combined using 105-38 was lower at 0.45nM (Figure 3D). To note, although 105-38 showed a much weaker neutralization ability in pseudoviral assay, but it recognized different epitope as 414-1 (data not show), explaining the combinatorial enhancement. We also tested 414-1 expressing in CHO cells, and found it could achieve 300 mg/L with any optimization suggesting for great potential in therapeutic development. The other 7 antibodies also showed strong neutralization abilities with IC<sub>50</sub> within 10 nM (Figure 3D).

## **Cross-reactivity with SARS-CoV Spike protein**

The spike proteins of SARS-CoV-2 share about 76% and 35% of amino acid identities with SARS-CoV and MERS-CoV, therefore, we tested whether our antibodies could recognize the S protein of these other two coronaviruses. We overexpressed the S proteins of SARS-CoV-2, SARS-CoV and MERS-CoV in HEK293T, and tested the cross-reactivities by flow cytometry analysis. After removal of the antibodies showing non-specific binding to HEK293T cells, we focused on 31 antibodies with robust S protein binding ability (Figure 4A), among these, we identified 3 antibodies, 415-5, 415-6, 515-5, could recognize the S protein of SARS-CoV but none recognized MERS-CoV S protein (Figure 4B). Interestingly, 415-5 and 515-5 shared similar S protein affinities of SARS-CoV-2 and SARS-CoV, but 415-6 had much lower S protein affinity of SARS-CoV (Figure 4C). Interestingly, we observed a certain neutralizing ability of 515-5 to SARS-CoV (Table S3).

## **Acknowledgments:**

We appreciate the Novoprotein Scientific Inc. for gifting SARS-CoV-2 Spike, ACE2 and related recombinant proteins. Drs. Lu Lu and Zhigang Lu from Fudan University provided 293T-ACE2 cell line and helpful suggestions. We thank Lilin Ye from Third Military Medical University for helpful suggestions and manuscript writing.

## **Funding:**

This work was supported by Zhejiang University special scientific research fund for COVID-19 prevention and control (2020XGZX023), the National Major Science and Technology Projects of China (2018ZX10301403), National Key Research and Development program of China (2016YFA0101800), the Shanghai Municipal Science and Technology Major Project (2017SHZDZX01) and the National Natural Science Foundation of China (81773014).

## **Author contributions:**



F.L., J.X., Y.L. and X.W. conceived the project. J.W., S.X., L.D. and, Y.W. S.Y., C.Z. and C.Q. did the experiments. All authors contributed to data analysis. F.L., J.W., S.X., L.D. wrote the manuscript.

### **Competing interests:**

Fei Lan hold the share of Active Motif China Inc.

## **Materials and methods**

### **Ethics statement**

The experiments involving authentic COVID-19 virus were performed in Fudan University biosafety level 3 (BSL-3) facility. The overall study was reviewed and approved by the SHAPHC Ethics Committee (approval no. 2020-Y008-01).

### **Cell and Viruses**

HEK293E cell line was a gift from Yanhui Xu lab, Fudan University. Vero E6, A549-Spike, and A549-ACE2 cell lines were supplied by Shanghai Public Health Clinical Center, Fudan University. 293T-ACE2 cell line was provided by Lu Lu from Fudan University. Pseudovirus was provided by Shanghai Public Health Clinical Center, and Fudan University and SARS-CoV-2-SH01 was from BSL-3 of Fudan University.

### **B cell sorting and single-cell RT-PCR**

Samples of peripheral blood for serum or mononuclear cells (PBMCs) isolation were obtained from Shanghai Public Health Clinical Center, per 5 mL blood. PBMCs were purified using the gradient centrifugation method with Ficoll and cryopreserved in 90% heat-inactivated fetal bovine serum (FBS) supplemented with 10% dimethylsulfoxide (DMSO), storage in liquid nitrogen.

The fluorescently labeled S1 bait was previously prepared by incubating 5 ug of His tag-S1 protein with Anti His tag antibody-PE for at least 1 hr at 4C in the dark. PBMCs were stained using 7AAD, anti-human CD19 (APC), IgM [PE-Cy7], IgG (fluorescein isothiocyanate (FITC)), PE labeled Antigen. Single antigen specific memory B cells were sorted on BD FACSAria II into 96-well PCR plates (Axygen) containing 10 µl per



well of lysis buffer [10 mM DPBS, 4 U Mouse RNase Inhibitor (NEB)]. Plates were immediately frozen on dry ice and stored at 80°C or processed for cDNA synthesis. Reverse transcription and subsequent PCR amplification of heavy and light chain variable genes were performed using SuperScript III (Life Technologies). First and second PCR reactions were performed in 50 µl volume with 5 µl of reaction product using PCR mixture (SMART-Lifesciences). PCR products were then purified using DNA FragSelect XP Magnetic Beads (SMART-Lifesciences) and cloned into human IgG1, lambda or kappa expression plasmids for antibody expression by seamless cloning method. After transformation, individual colonies were picked for sequencing and characterization. Sequences were analyzed using IMGT/ V-QUEST ([http://www.imgt.org/IMGT\\_vquest](http://www.imgt.org/IMGT_vquest)) and IgBlast (IgBLAST, <http://www.ncbi.nlm.nih.gov/igblast>)

### **Expression and purification of human monoclonal antibodies**

The antibody VH/VL and constant region genes were then amplified and cloned into expression vector pcDNA3.4 using SMART Assembly Cloning Kit (SMART-Lifesciences), subsequently antibodies plasmids were amplified in competent cells (SMART-Lifesciences). Expressing in HEK293E with transfecting by polyethylenimine (PEI) (Sigma), after 3 days cell culture, antibodies purification was processing in medium supernatant. Purified antibodies was binding with ProteinA magnetic beads (SMART-Lifesciences) 30 min at room temperature, then eluted in 100 mM Glycine pH 3.0 and neutralized with Tris-HCl 7.4.

### **ELISA analysis of antibody binding to CoV spike antigens**

ELISA analysis 96-well plates (Falcon and MATRIX) were coated overnight at 4°C with 0.5 µg/mL SARS-CoV-2 RBD-mFC (Novoprotein Scientific Inc.), and 0.6 µg/mL SARS-CoV-2 S-ECD (GenScript). After washing with PBS/T (SMART-Lifesciences), the plates were blocked using 3% non-fat milk in PBS/T for 1 h at 37°C. Washing with PBST, gradient dilutions in PBS/T of antibodies were added to each well and incubated at 37°C for 1 h. Washing with PBS/T three times, HRP-conjugated anti-human IgG Fab antibody (Sigma) was added at the dilution of 1:10000 in PBS/T

containing 3%BSA (Sangon Biotech) and incubated at 37°C for 0.5 h. After washing with PBS/T three times, TMB solution (SMART-Lifesciences) was added to the microplate and incubated at room temperature for 5-10 min, followed by adding 1M HCl to terminate the reaction. The OD450 absorbance was detected by Synergy HT Microplate Reader (Bio-Tek) . The curves and EC50 were analyzed by GraphPad Prism 8.0.

### **Sensor preparation for surface plasmon resonance (SPR)**

Kinetic screening of the mAb panel was performed in the IBIS MX96 by injecting the S protein RBD in a 2-fold dilution series from 50 to 3.125 nM in running buffer (PBS with 0.075% Tween80). After each antigen injection, the sensor surface was regenerated twice with 20 mM H3PO4 pH 2.0 for 16 s. IBIS SPRintX software was used to process the data. Scrubber2 software (BioLogic Software) was used to analyze the data and obtain kinetic information.

### **Flow cytometry-based receptor-binding inhibition assay**

Flow cytometry analysis was performed to detect the binding ability of antibodies to Spike protein in HEK293T cells freshly expressing of SARS-CoV-2 SARS-CoV and MERS-CoV. HEK293T without transfection were used as controls. Briefly, 10 thousand cells in 100 µl were incubated with antibodies for 30 min at room temperature, after washed twice incubated with PE-labeled goat anti-human IgG-Fc antibody (1:5000; ABcam) for 30 min and analyzed by flow cytometry.

Flow cytometry analysis was also performed to detect the ACE2-binding inhibition of SARS-CoV-2 S protein in A549 cells stably expressing SARS-CoV-2 S Protein. Briefly, 10 thousand cells in 100 µl were incubated with ACE2 at 50nM for 30 min at room temperature, then put in antibody incubated for 30 min, finally incubated with PE-labeled goat anti-human IgG-Fc antibody (1:5000; ABcam) for 30 min and analyzed by flow cytometry. The ACE2 binding assay was performed by incubation of soluble human PE-Labeled ACE2 50nM with 10 thousand cells in 100 µl for 10 min at room temperature, then washed twice and analyzed by flow cytometry. PE-labeled ACE2 was performed by ACE2-Cter-6XHis incubated with rabbit anti-His-PE antibody in 1.2:1(*n:n*) for 30 min at room temperature.

## **Virus neutralization assay (pseudotyped and authentic)**

Genes of SARS-CoV-2 (YP\_009724390.1), SARS-CoV (NP\_828851.1) and MERS (AFS88936.1) Spike proteins were synthesized (GenScript) and cloned into pcDNA3.1. SARS-CoV-2, SARS-CoV and MERS pseudo-typed viruses were produced as previously described<sup>27</sup>. Briefly, pseudovirus were generated by co-transfection of 293T cells with pNL4-3.Luc.R-E- backbone and the SARS-CoV-2 spike protein expression plasmid in 10cm cell culture dishes and the supernatants were harvested after 48 h, and followed by centrifuge at 2000rpm 5 mins and stored pseudovirus in -80°C.

The neutralization assay was performed as the following steps: Pseudovirus was diluted in complete DMEM mixed with or without an equal volume (50 µl) of diluted serum or antibody and then incubated at 37 °C for 1 h. The mixtures were then transferred to 96-well plate seeding with 20,000 293T-ACE2 cells for 12h and incubated at 37 °C for additional 48 h. Assays were developed with bright glo luciferase assay system (Promega), and the relative light units (RLU) were read on a luminometer (Promega GloMax 96). The titers of neutralizing antibodies were calculated as 50% inhibitory dose (ID50), expressed as the highest dilution of plasma which resulted in a 50% reduction of luciferase luminescence compared with virus control.

All experiments about authentic virus were done in BSL-3. The cell culture medium contained a series of gradient of human monoclonal antibodies to SARS-CoV-2. After incubating with 200 PFU SARS-CoV-2 SH01 at 37°C for 1 hour, it is added to VERO E6 cell line (96-well plate,  $2 \times 10^4$  cells per well), and the cells were continued to be cultured for 24-72h with observing the cytopathic phenotype every day.

## **Figure legends**

### **Fig.1 Isolation of antigen-specific monoclonal antibodies from convalescent patients of SARS-CoV-2.**

(A) Schematic depicting the screening strategy that was used to sorting B cells from SARS-CoV-2 patient and antibodies expression. (B) Spike protein binding and pseudoviral neutralizing of donors plasma. RBD (receptor binding domain) and S1, were used in ELISA to test the binding of plasma. Plasma of healthy donors were used as control. Neutralization of pseudotyped virus by 11 patients' sera The mean

values and standard deviations of two technical replicates are shown (C) Flow cytometry sorting from PBMCs of 11 convalescent patients. (D) Maximum-likelihood phylogenetic tree of our sequenced monoclonal antibodies' heavy chains. Different color represents the sequence isolated from different patient serum.

### **Fig.2 Binding profiles of Spike protein-specific antibodies.**

(A) ELISA and SPR binding curves of 414-1, 505-3 and 553-63 to RBD of SARS-CoV-2 coated at 96-wells microplate with the concentration of 0.5 ug/mL. (B) Flow cytometry analysis of representative antibodies binding to SARS-CoV-2 S protein expressing at cell membrane of A549 cell lines. Incubated only with IgG-Fc-PE antibody cells were as control. (C) Characteristic of antibodies binding with Spike protein RBD and S-ECD. RBD and S-ECD double binding positive antibodies are within red circle, and only S-ECD positive antibodies are within purple circle. (D) Overlapping of ELISA binding positive ( $K_D < 10\text{nM}$ , 27 antibodies) and flow cytometry (gated rate  $> 10\%$ , 43 antibodies). The red area represents ELISA assay positive, and the green area represents flow cytometry assay positive.

### **Fig.3 Neutralizing capacities (pseudotyped virus and authentic virus) of SARS-CoV-2 specific mAbs.**

(A) Summary of phenotypical characterization of partial isolated monoclonal antibodies of 11 patients. Red color highlights the good characteristics of mAbs, and green color (flow cytometry) represents binding positive with SARS-CoV-2 Spike on cell membrane. (B) Curves of pseudoviral neutralizing capacity and blocking ELISA of 414-1, 505-3 and 553-63. The mean values and standard deviations of two technical replicates are shown in pseudoviral neutralizing assay. (C) Binding competition assay of 414-1, 505-3 and 553-63 using flow cytometry. The blue dots represent A549-Spike treated with mAbs, and the red dots represent A549-Spike with mAbs and 50nM human ACE2. (D) Neutralization of authentic virus assay in Vero-E6 with infecting by SARS-CoV-2-SH01. Blue color represents 414-1 only, and red color represents 414-1 combined with 105-38.

### **Fig.4 Cross-reactivity with SARS-CoV.**

(A) Heatmap of representative antibodies cross-reactivity with SARS-CoV and MERS-CoV. Flow cytometry analysis of antibodies binding to S protein of SARS-CoV-2, SARS-CoV and MERS-CoV in 293T cells freshly expressing. Non-transfection 293T were used as controls. Antibodies (50nM) incubated with cells. (B) Flow cytometry analysis of 3 antibodies binding to S protein of SARS-CoV-2, SARS-CoV and MERS-CoV in 293T. (C) Binding ability of cross-reactive with SARS-CoV. Binding ability of antibodies detected by flow cytometry.

### **Supplementary Figure legends**

#### **Tab.S1**

Summary of numbers of obtained B cells and antibody clones from 11 patients.

#### **Tab.S2**

Summary of characteristics and symptoms of 11 COVID-19 patients.

#### **Tab.S3**

The cross neutralizing ability of 515-5 to pseudotyped SARS-CoV.

#### **Fig. S1**

Summary of ELISA binding curves of partial SARS-CoV-2 specific monoclonal antibodies.

#### **Fig. S2**

ACE2 binding with Spike protein expressed in A549. Flow cytometry analysis of ACE2 binding to Spike protein in A549 stable expression cells. Non-expressing Spike protein A549 were used as controls. ACE2 protein (50nM) labeled-PE incubated with 10 thousand cells for 30min.

#### **Fig. S3**

Three representative antibodies binding ability of Spike protein expressed in cell membrane. Antibodies incubated with 10 thousand cells for 30min and detected by flow cytometry analysis. Non-expressing Spike protein A549 were used as controls.

#### **Fig. S4**

The binding performance of 414-1 antibody to RBD protein of SARS-CoV-2 in pH7.4 (shown in blue) and pH5.0 (shown in red).

## References and notes:

- 1 Chang, C., Ortiz, K., Ansari, A. & Gershwin, M. E. The Zika outbreak of the 21st century. *Journal of Autoimmunity* **68**, 1-13, doi:10.1016/j.jaut.2016.02.006 (2016).
- 2 Peiris, J. *et al.* Clinical progression and viral load in a community outbreak of coronavirus-associated SARS pneumonia: a prospective study. *The Lancet* **361**, 1767-1772, doi:10.1016/s0140-6736(03)13412-5 (2003).
- 3 Bauch, C. T. & Oraby, T. Assessing the pandemic potential of MERS-CoV. *The Lancet* **382**, 662-664, doi:10.1016/s0140-6736(13)61504-4 (2013).
- 4 Callaway, E., Cyranoski, D., Mallapaty, S., Stoye, E. & Tollefson, J. The coronavirus pandemic in five powerful charts. *Nature* **579**, 482-483, doi:10.1038/d41586-020-00758-2 (2020).
- 5 Zhou, P. *et al.* A pneumonia outbreak associated with a new coronavirus of probable bat origin. *Nature* **579**, 270-273, doi:10.1038/s41586-020-2012-7 (2020).
- 6 Wu, F. *et al.* A new coronavirus associated with human respiratory disease in China. *Nature* **579**, 265-269, doi:10.1038/s41586-020-2008-3 (2020).
- 7 Huang, C. *et al.* Clinical features of patients infected with 2019 novel coronavirus in Wuhan, China. *The Lancet* **395**, 497-506, doi:10.1016/s0140-6736(20)30183-5 (2020).
- 8 The species Severe acute respiratory syndrome-related coronavirus: classifying 2019-nCoV and naming it SARS-CoV-2. *Nature Microbiology* **5**, 536-544, doi:10.1038/s41564-020-0695-z (2020).
- 9 Chen, N. *et al.* Epidemiological and clinical characteristics of 99 cases of 2019 novel coronavirus pneumonia in Wuhan, China: a descriptive study. *Lancet* **395**, 507-513, doi:10.1016/S0140-6736(20)30211-7 (2020).
- 10 Chen, L., Xiong, J., Bao, L. & Shi, Y. Convalescent plasma as a potential therapy for COVID-19. *The Lancet Infectious Diseases* **20**, 398-400, doi:10.1016/s1473-3099(20)30141-9 (2020).
- 11 Wu, F. a. W., Aojie and Liu, Mei and Wang, Qimin and Chen, Jun and Xia, Shuai and Ling, Yun and Zhang, Yuling and Xun, Jingna and Lu, Lu and Jiang, Shibo and Lu, Hongzhou and Wen, Yumei and Huang, Jinghe, . Neutralizing Antibody Responses to SARS-CoV-2 in a COVID-19 Recovered Patient Cohort and Their Implications *The Lancet*, doi:http://dx.doi.org/10.2139/ssrn.3566211 ((3/28/2020).).
- 12 Group, P. I. W. *et al.* A Randomized, Controlled Trial of ZMapp for Ebola Virus Infection. *N Engl J Med* **375**, 1448-1456, doi:10.1056/NEJMoa1604330 (2016).
- 13 Stalin Raj, V. *et al.* Chimeric camel/human heavy-chain antibodies protect against MERS-CoV infection. *Sci Adv* **4**, eaas9667, doi:10.1126/sciadv.aas9667 (2018).
- 14 Ou, X. *et al.* Characterization of spike glycoprotein of SARS-CoV-2 on virus entry and its immune cross-reactivity with SARS-CoV. *Nat Commun* **11**, 1620, doi:10.1038/s41467-020-15562-9 (2020).
- 15 Tian, X. *et al.* Potent binding of 2019 novel coronavirus spike protein by a SARS coronavirus-specific human monoclonal antibody. *Emerging Microbes & Infections* **9**, 382-385, doi:10.1080/22221751.2020.1729069 (2020).
- 16 Tai, W. *et al.* Characterization of the receptor-binding domain (RBD) of 2019 novel coronavirus: implication for development of RBD protein as a viral attachment inhibitor and vaccine. *Cellular & Molecular Immunology*, doi:10.1038/s41423-020-0400-4 (2020).



- 17 Walls, A. C. *et al.* Structure, Function, and Antigenicity of the SARS-CoV-2 Spike Glycoprotein. *Cell* **181**, 281-292 e286, doi:10.1016/j.cell.2020.02.058 (2020).
- 18 Chan, J. F.-W. *et al.* Genomic characterization of the 2019 novel human-pathogenic coronavirus isolated from a patient with atypical pneumonia after visiting Wuhan. *Emerging Microbes & Infections* **9**, 221-236, doi:10.1080/22221751.2020.1719902 (2020).
- 19 Wrapp, D. *et al.* Cryo-EM structure of the 2019-nCoV spike in the prefusion conformation. *Science* **367**, 1260-1263, doi:10.1126/science.abb2507 (2020).
- 20 Hoffmann, M. *et al.* SARS-CoV-2 Cell Entry Depends on ACE2 and TMPRSS2 and Is Blocked by a Clinically Proven Protease Inhibitor. *Cell* **181**, 271-280.e278, doi:10.1016/j.cell.2020.02.052 (2020).
- 21 Chen, X. *et al.* Human monoclonal antibodies block the binding of SARS-CoV-2 spike protein to angiotensin converting enzyme 2 receptor. *Cell Mol Immunol*, doi:10.1038/s41423-020-0426-7 (2020).
- 22 Chi, X. *et al.* A potent neutralizing human antibody reveals the N-terminal domain of the Spike protein of SARS-CoV-2 as a site of vulnerability (Cold Spring Harbor Laboratory, 2020).
- 23 Wang, C. *et al.* A human monoclonal antibody blocking SARS-CoV-2 infection. *Nat Commun* **11**, 2251, doi:10.1038/s41467-020-16256-y (2020).
- 24 Wu, Y. *et al.* A noncompeting pair of human neutralizing antibodies block COVID-19 virus binding to its receptor ACE2. *Science*, doi:10.1126/science.abc2241 (2020).
- 25 Yunlong Cao, B. S., Xianghua Guo, Wenjie Sun, Yongqiang Deng, Linlin Bao, Qinyu Zhu, Xu Zhang, Yinghui Zheng, Chenyang Geng, Xiaoran Chai, Runsheng He, Xiaofeng Li, Qi Lv, Hua Zhu, Wei Deng, Yanfeng Xu, Yanjun Wang, Luxin Qiao, Yafang Tan, Liyang Song, Guopeng Wang, Xiaoxia Du, Ning Gao, Jiangning Liu, Junyu Xiao, Xiao-dong Su, Zongmin Du, Yingmei Feng, Chuan Qin, Chengfeng Qin, Ronghua Jin, X. Sunney Xie. Potent neutralizing antibodies against SARS-CoV-2 identified by high-throughput single-cell sequencing of convalescent patients' B cells. *Cell*, doi:doi: <https://doi.org/10.1016/j.cell.2020.05.025>. (2020).
- 26 Robbiani, D. F. *et al.* Recurrent Potent Human Neutralizing Antibodies to Zika Virus in Brazil and Mexico. *Cell* **169**, 597-609 e511, doi:10.1016/j.cell.2017.04.024 (2017).
- 27 Qiu, C. *et al.* Safe pseudovirus-based assay for neutralization antibodies against influenza A(H7N9) virus. *Emerg Infect Dis* **19**, 1685-1687, doi:10.3201/eid1910.130728 (2013).





**Fig. 2****A**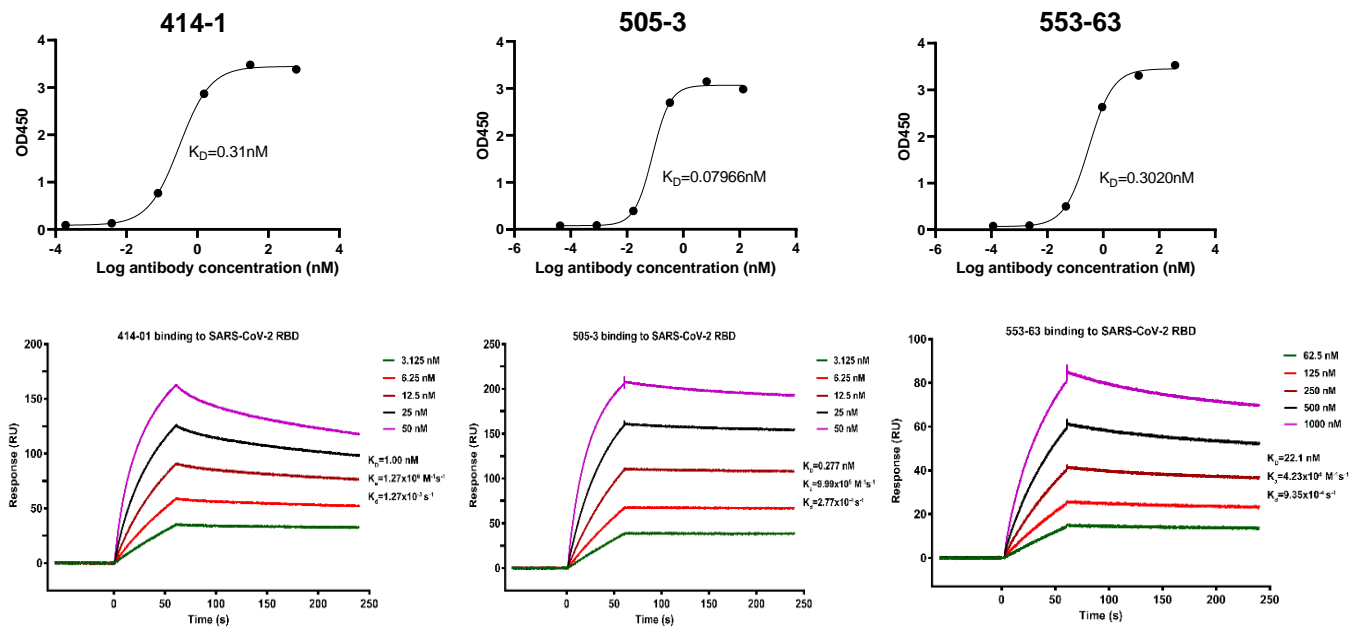**B**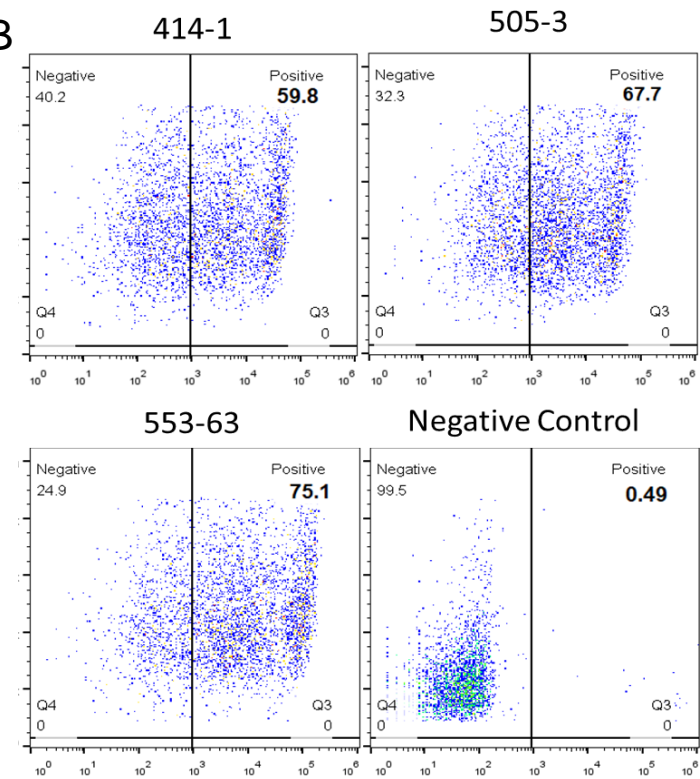**C**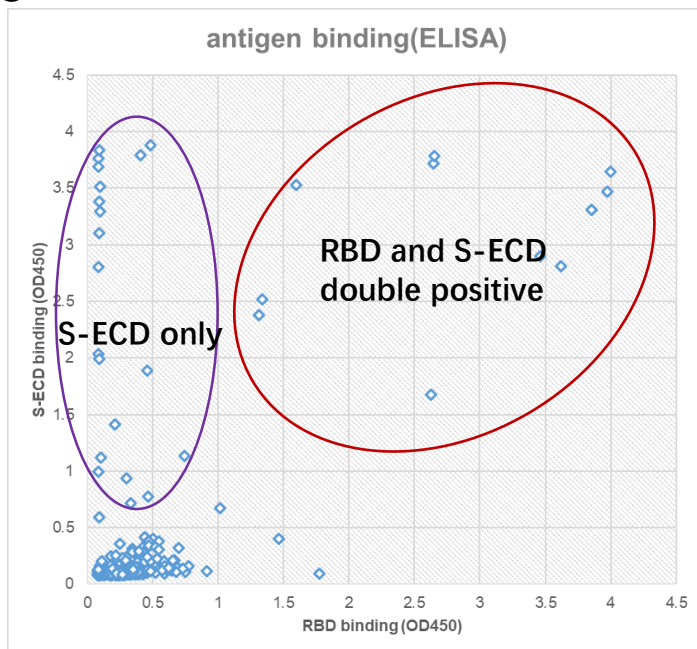**D**

| Kd (nM)     | <1 | 1~20 | >20 |
|-------------|----|------|-----|
| Overlap     | 15 | 6    | 4   |
| Non-Overlap | 2  | 5    | 6   |

**Fig. 3****A**

| Antibody | Binding ELISA Kd (nM) | Pseudoviral IC50(nM) | Blocking ELISA IC50(nM) | SARS-CoV-2 positivity (%) | 50nM ACE2 |     |       |
|----------|-----------------------|----------------------|-------------------------|---------------------------|-----------|-----|-------|
|          |                       |                      |                         |                           | 10nM      | 1nM | 0.1nM |
| 105-9    | 0.257                 | >100                 | 4.663                   | 56.260                    |           |     |       |
| 105-25   | 55.150                | non                  | non                     | <1                        |           |     |       |
| 105-28   | 4.244                 | non                  | non                     | <1                        |           |     |       |
| 105-38   | 0.099                 | >100                 | 0.122                   | 33.110                    |           |     |       |
| 105-41   | 4.811                 | non                  | non                     | <1                        |           |     |       |
| 105-43   | 3.042                 | non                  | non                     | 34.580                    |           |     |       |
| 413-2    | 0.060                 | non                  | non                     | 39.320                    |           |     |       |
| 413-3    | 2.655                 | non                  | non                     | <1                        |           |     |       |
| 414-1    | 0.560                 | 3.085                | 2.964                   | 58.530                    |           |     |       |
| 414-2    | 0.074                 | 12.721               | non                     | 64.160                    |           |     |       |
| 414-3-1  | 64.630                | non                  | non                     | 17.960                    |           |     |       |
| 414-3-2  | 6.650                 | non                  | non                     | 30.680                    |           |     |       |
| 414-4    | 3.119                 | >100                 | non                     | <1                        |           |     |       |
| 414-5    | 0.148                 | non                  | 12.030                  | <1                        |           |     |       |
| 415-5    | 10.520                | >100                 | non                     | 44.530                    |           |     |       |
| 415-6    | 0.701                 | non                  | non                     | 17.580                    |           |     |       |
| 505-3    | 0.080                 | 2.313                | 0.719                   | 61.640                    |           |     |       |
| 505-5    | 0.059                 | 26.370               | 0.175                   | 56.630                    |           |     |       |
| 505-8    | 17.620                | >100                 | non                     | 30.440                    |           |     |       |
| 505-17   | 78.630                | non                  | non                     | 29.760                    |           |     |       |
| 515-1    | 0.057                 | 26.110               | 0.719                   | 53.800                    |           |     |       |
| 515-5    | 119.700               | non                  | non                     | 34.080                    |           |     |       |
| 553-13   | 0.683                 | non                  | non                     | 77.000                    |           |     |       |
| 553-15   | 0.089                 | non                  | 0.325                   | 41.680                    |           |     |       |
| 553-17   | 17.310                | non                  | non                     | 42.770                    |           |     |       |
| 553-18   | 0.853                 | non                  | non                     | 61.040                    |           |     |       |
| 553-20   | 0.133                 | non                  | non                     | 63.450                    |           |     |       |
| 553-27   | 0.769                 | non                  | non                     | 41.630                    |           |     |       |
| 553-49   | 0.076                 | >100                 | non                     | 32.561                    |           |     |       |
| 553-60   | 5.753                 | non                  | non                     | 36.750                    |           |     |       |
| 553-63   | 0.302                 | 3.569                | 0.237                   | 73.730                    |           |     |       |

5 times Competition  
 50 times Competition  
 500 times Competition

**B**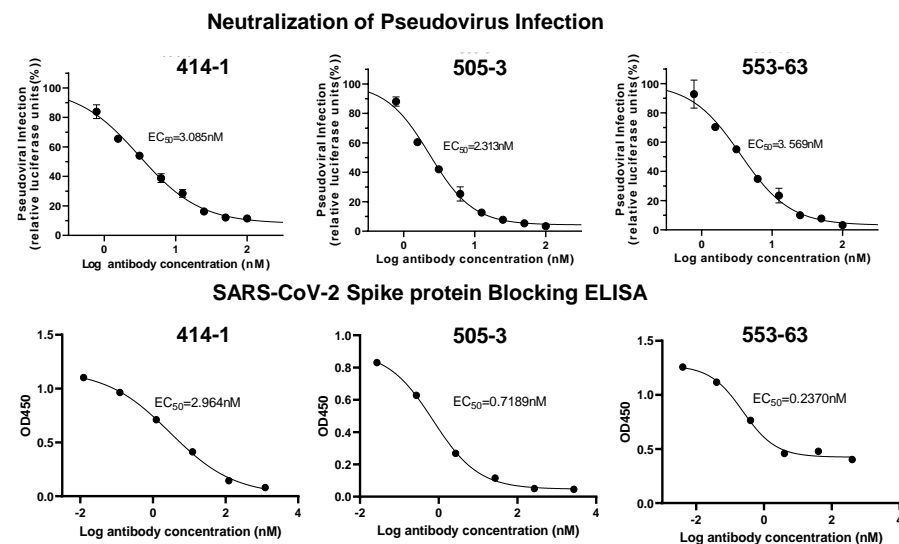**C**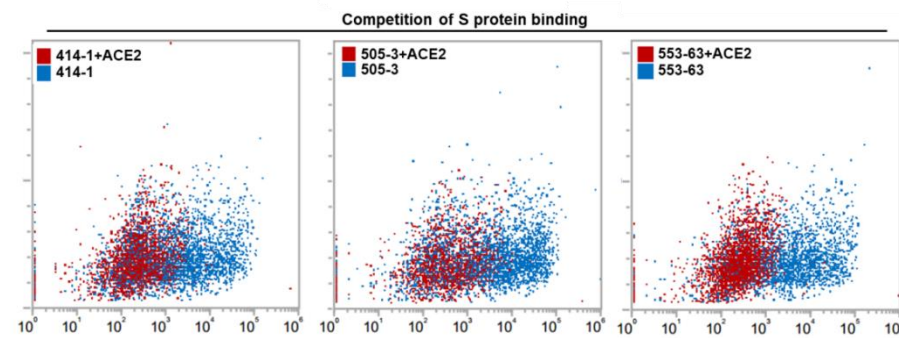**D**

**Authentic SARS-CoV-2 neutralization IC50 (nM)**

| Antibody     | IC50  |
|--------------|-------|
| 414-1+105-38 | 0.45  |
| 414-1        | 1.75  |
| 505-3        | ~ 3   |
| 505-8        | ~ 4   |
| 553-63       | ~ 6   |
| 505-5        | ~ 6   |
| 515-1        | ~ 6   |
| 553-60       | ~ 10  |
| 553-49       | ~ 10  |
| 553-15       | ~ 30  |
| 515-5        | ~ 100 |
| 413-2        | ~ 100 |

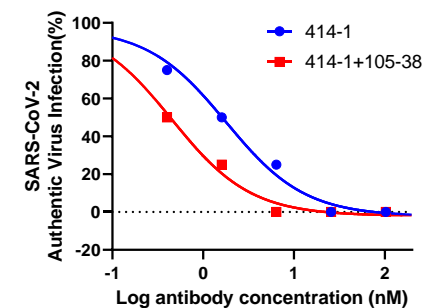

**Fig. 4****A**

| Antibody | SARS-CoV2 | SARS-CoV | MERS-CoV | Neg Ctrl |
|----------|-----------|----------|----------|----------|
| 105-9    | █         |          |          |          |
| 105-25   |           |          |          |          |
| 105-28   |           |          |          |          |
| 105-38   | █         |          |          |          |
| 105-41   |           |          |          |          |
| 105-43   | █         |          |          |          |
| 413-2    | █         |          |          |          |
| 413-3    |           |          |          |          |
| 414-1    | █         |          |          |          |
| 414-2    | █         |          |          |          |
| 414-3-1  | █         |          |          |          |
| 414-3-2  | █         |          |          |          |
| 414-4    |           |          |          |          |
| 414-5    |           |          |          |          |
| 415-5    | █         | █        |          |          |
| 415-6    | █         | █        |          |          |
| 505-3    | █         |          |          |          |
| 505-5    | █         |          |          |          |
| 505-8    | █         |          |          |          |
| 505-17   | █         |          |          |          |
| 515-1    | █         |          |          |          |
| 515-5    | █         | █        |          |          |
| 553-13   | █         |          |          |          |
| 553-15   | █         |          |          |          |
| 553-17   | █         |          |          |          |
| 553-18   | █         |          |          |          |
| 553-20   | █         |          |          |          |
| 553-27   | █         |          |          |          |
| 553-49   |           |          |          |          |
| 553-60   | █         |          |          |          |
| 553-63   | █         |          |          |          |

█ S protein Binding

**B**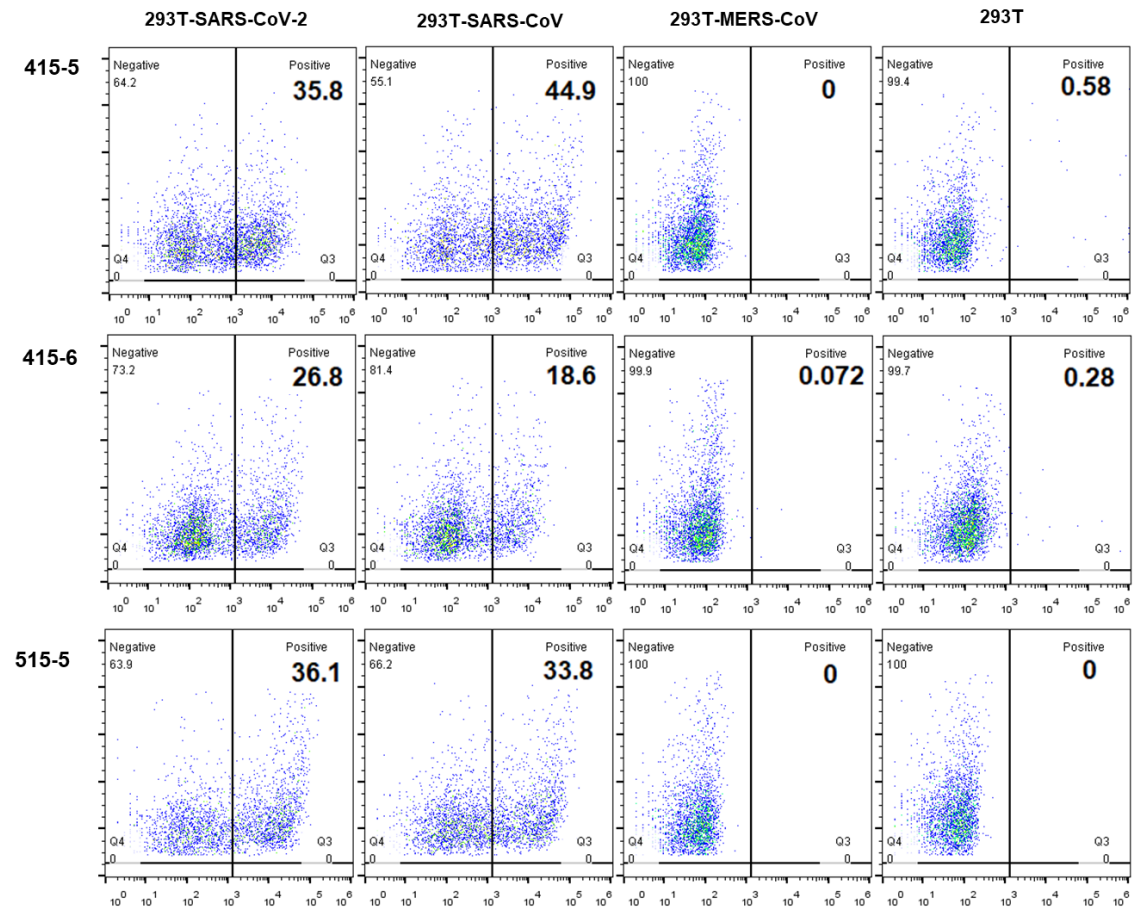**C**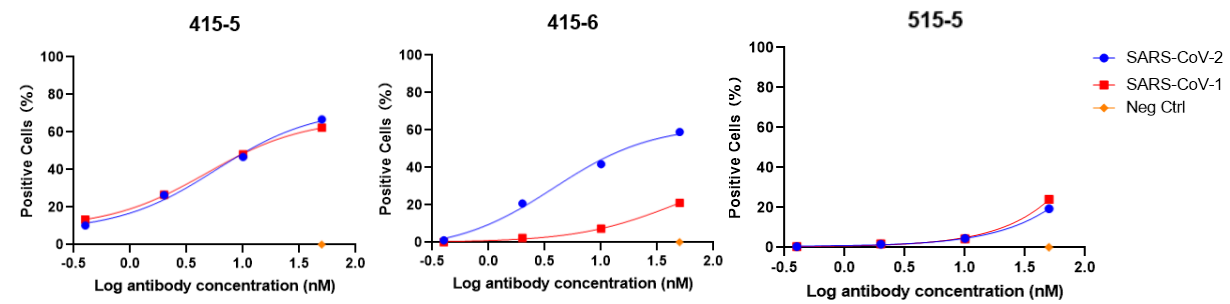

| <b>Donor</b> | <b>B cells counts</b> | <b>Clones</b> |
|--------------|-----------------------|---------------|
| 71           | 192                   | 16            |
| 105          | 192                   | 42            |
| 413          | 192                   | 35            |
| 414          | 192                   | 38            |
| 415          | 192                   | 22            |
| 501          | 192                   | 87            |
| 505          | 192                   | 74            |
| 509          | 192                   | 36            |
| 507          | 384                   | 146           |
| 515          | 192                   | 81            |
| 553          | 384                   | 152           |
| Total        | 2304                  | 729           |

**Table.S1**

| Patient characteristics                    |                                             |                                                       |                           |                             |                                                |         |                                         |         |                                                 |         |                                       |
|--------------------------------------------|---------------------------------------------|-------------------------------------------------------|---------------------------|-----------------------------|------------------------------------------------|---------|-----------------------------------------|---------|-------------------------------------------------|---------|---------------------------------------|
| Patient number                             | 71                                          | 105                                                   | 413                       | 414                         | 415                                            | 501     | 505                                     | 507     | 509                                             | 515     | 553                                   |
| Gender                                     | Female                                      | Male                                                  | Female                    | Male                        | Female                                         | Male    | Female                                  | Male    | Male                                            | Female  | Male                                  |
| Age(years)                                 | 35                                          | 30                                                    | 48                        | 56                          | 65                                             | 29      | 60                                      | 15      | 54                                              | 59      | 40                                    |
| Sampling time point(after hospitalization) | 10 days                                     | 18 days                                               | 19 days                   | 16 days                     | 16 days                                        | 12 days | 15 days                                 | 9 days  | 1 days                                          | 9 days  | 25 days                               |
| Fever                                      | Yes                                         | Yes                                                   | Yes                       | Yes                         | No data                                        | Yes     | Yes                                     | Yes     | No data                                         | Yes     | Yes(with myalgia)                     |
| Other infomations                          | Traveled in Shanghai from Wuhan at Jan 21st | Jan 13rd to 17th, spent time with a confirmed patient | Been to Wuhan at Jan 15th | Passed by Wuhan at Feb 23rd | Spent time with a low fever friend at Jan 19th | No data | Passing by Wuhan at Jan 17th for 1 hour | No data | Been close with a confirmed patient at Jan 14th | No data | Been to Wuhan for working at Jan 11st |

**Table.S2**

---

| <b>Pseudovirus neutralization (Ratio %)</b> |       |       |      |
|---------------------------------------------|-------|-------|------|
| Antibody Concentration (nM)                 | 300   | 100   | 30   |
| SARS-CoV-2                                  | 96.94 | 96.48 | 73.2 |
| SARS-CoV                                    | 98.94 | 92.28 | 7.44 |

---

**Table.S3**



**Fig. S1**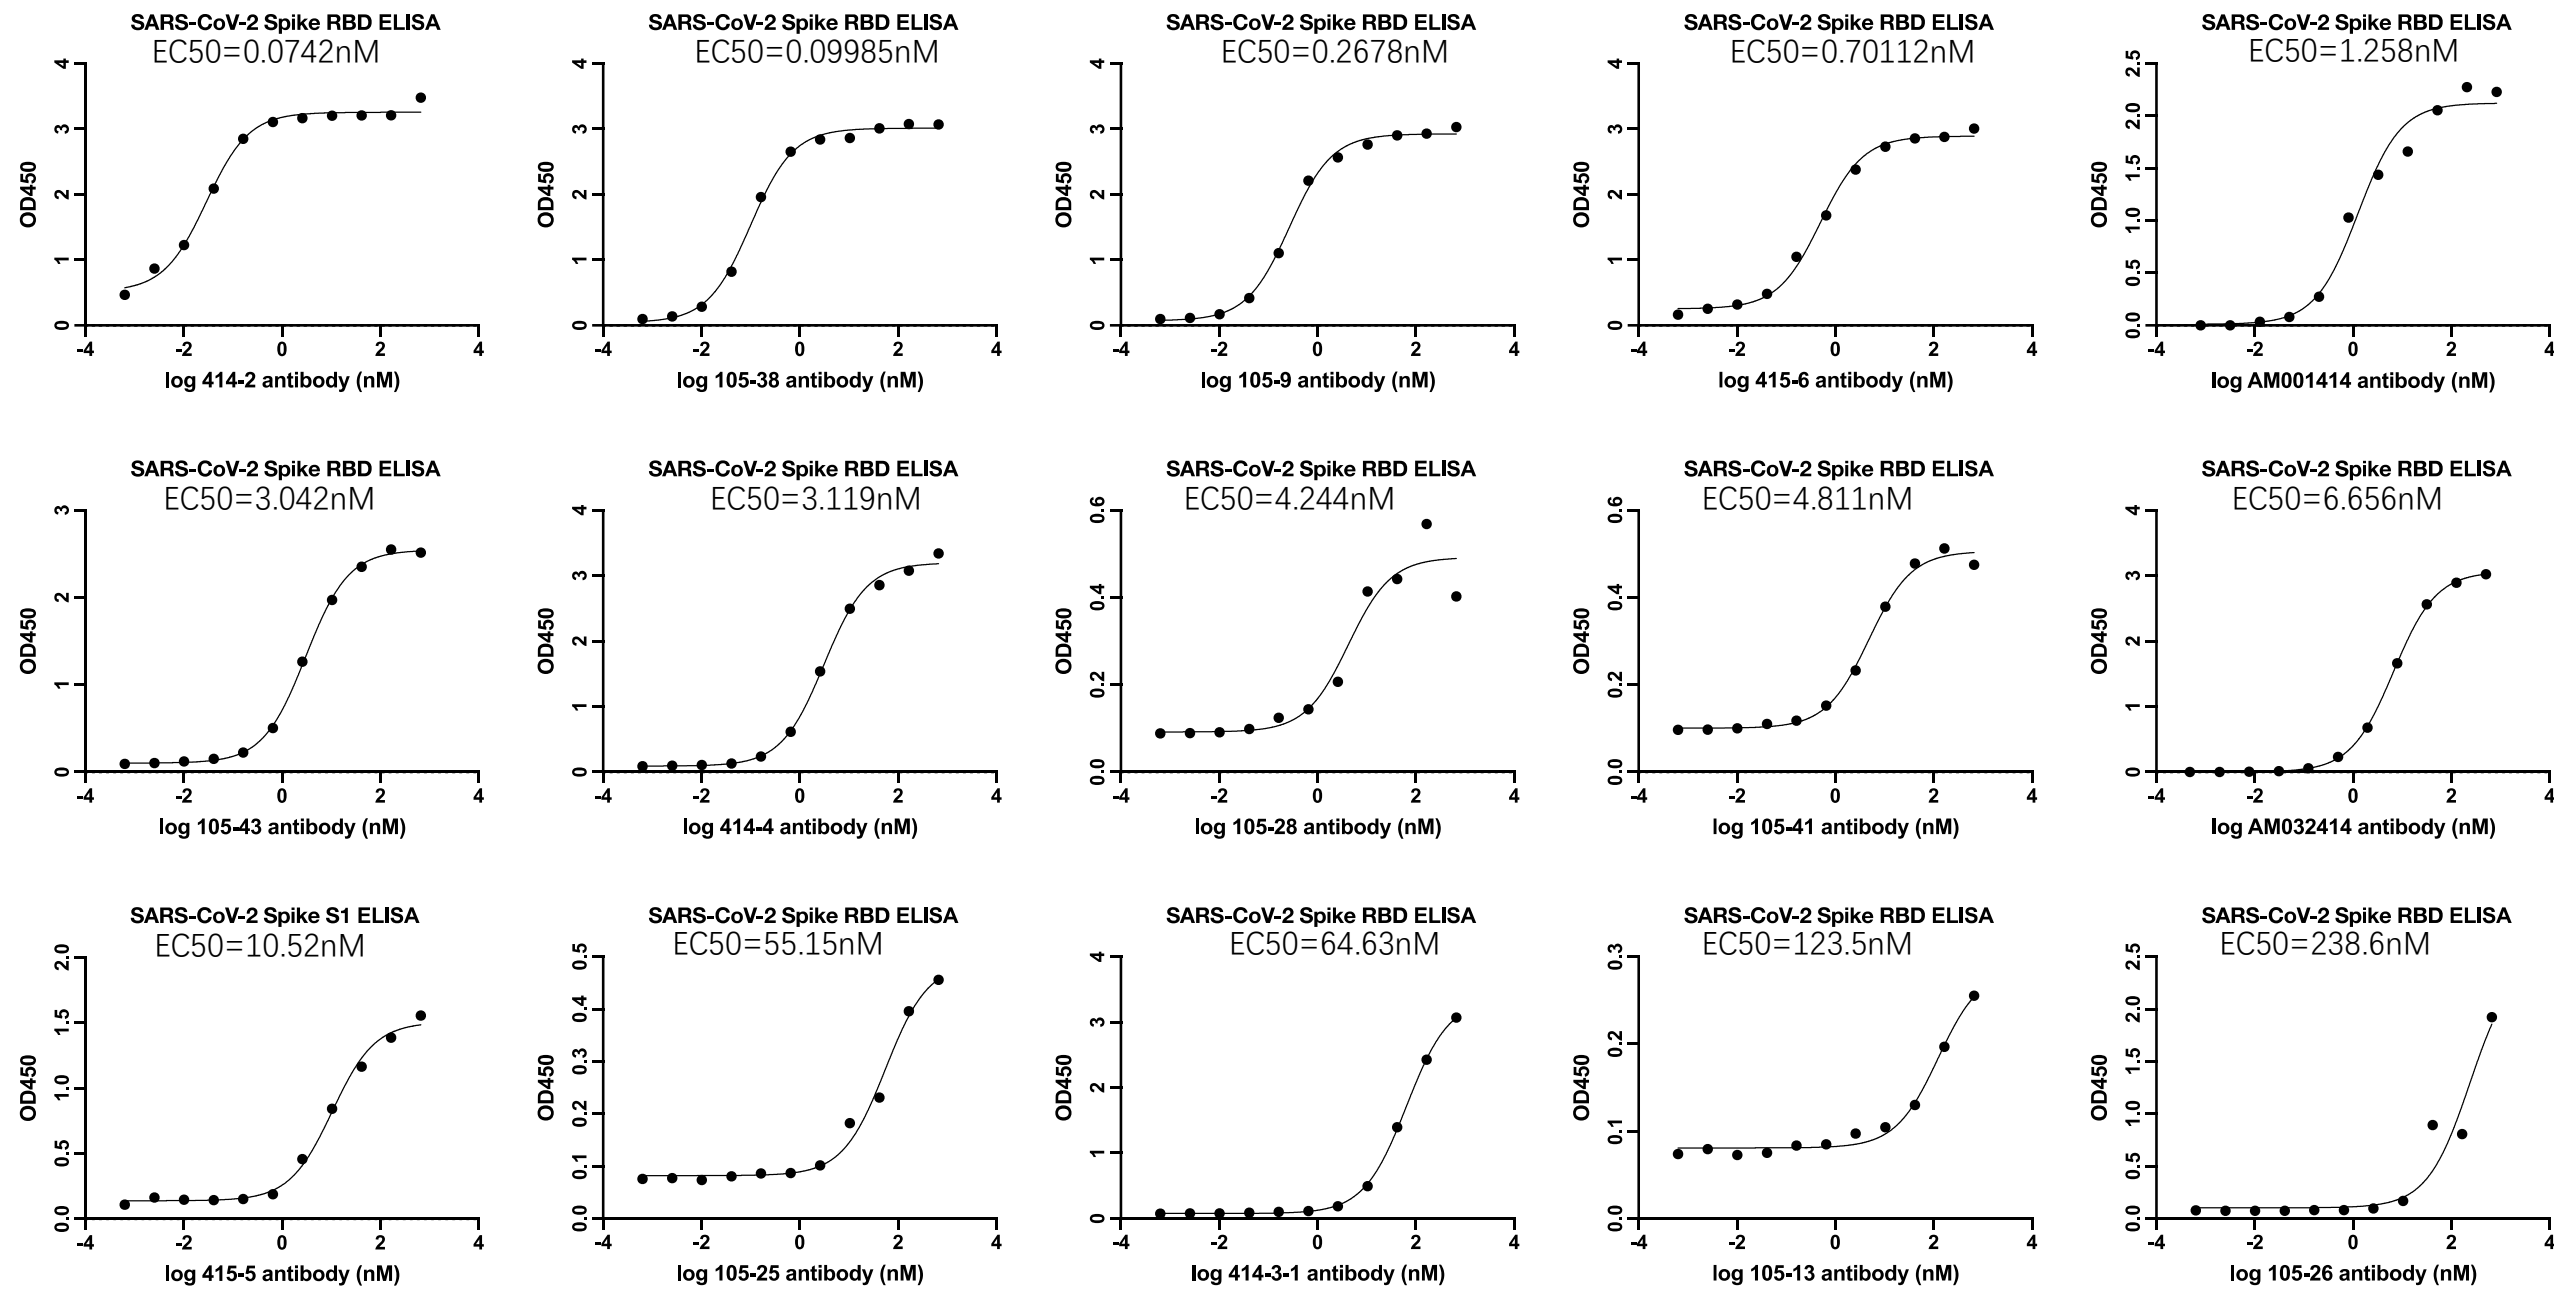

To be continued

# Fig. S1

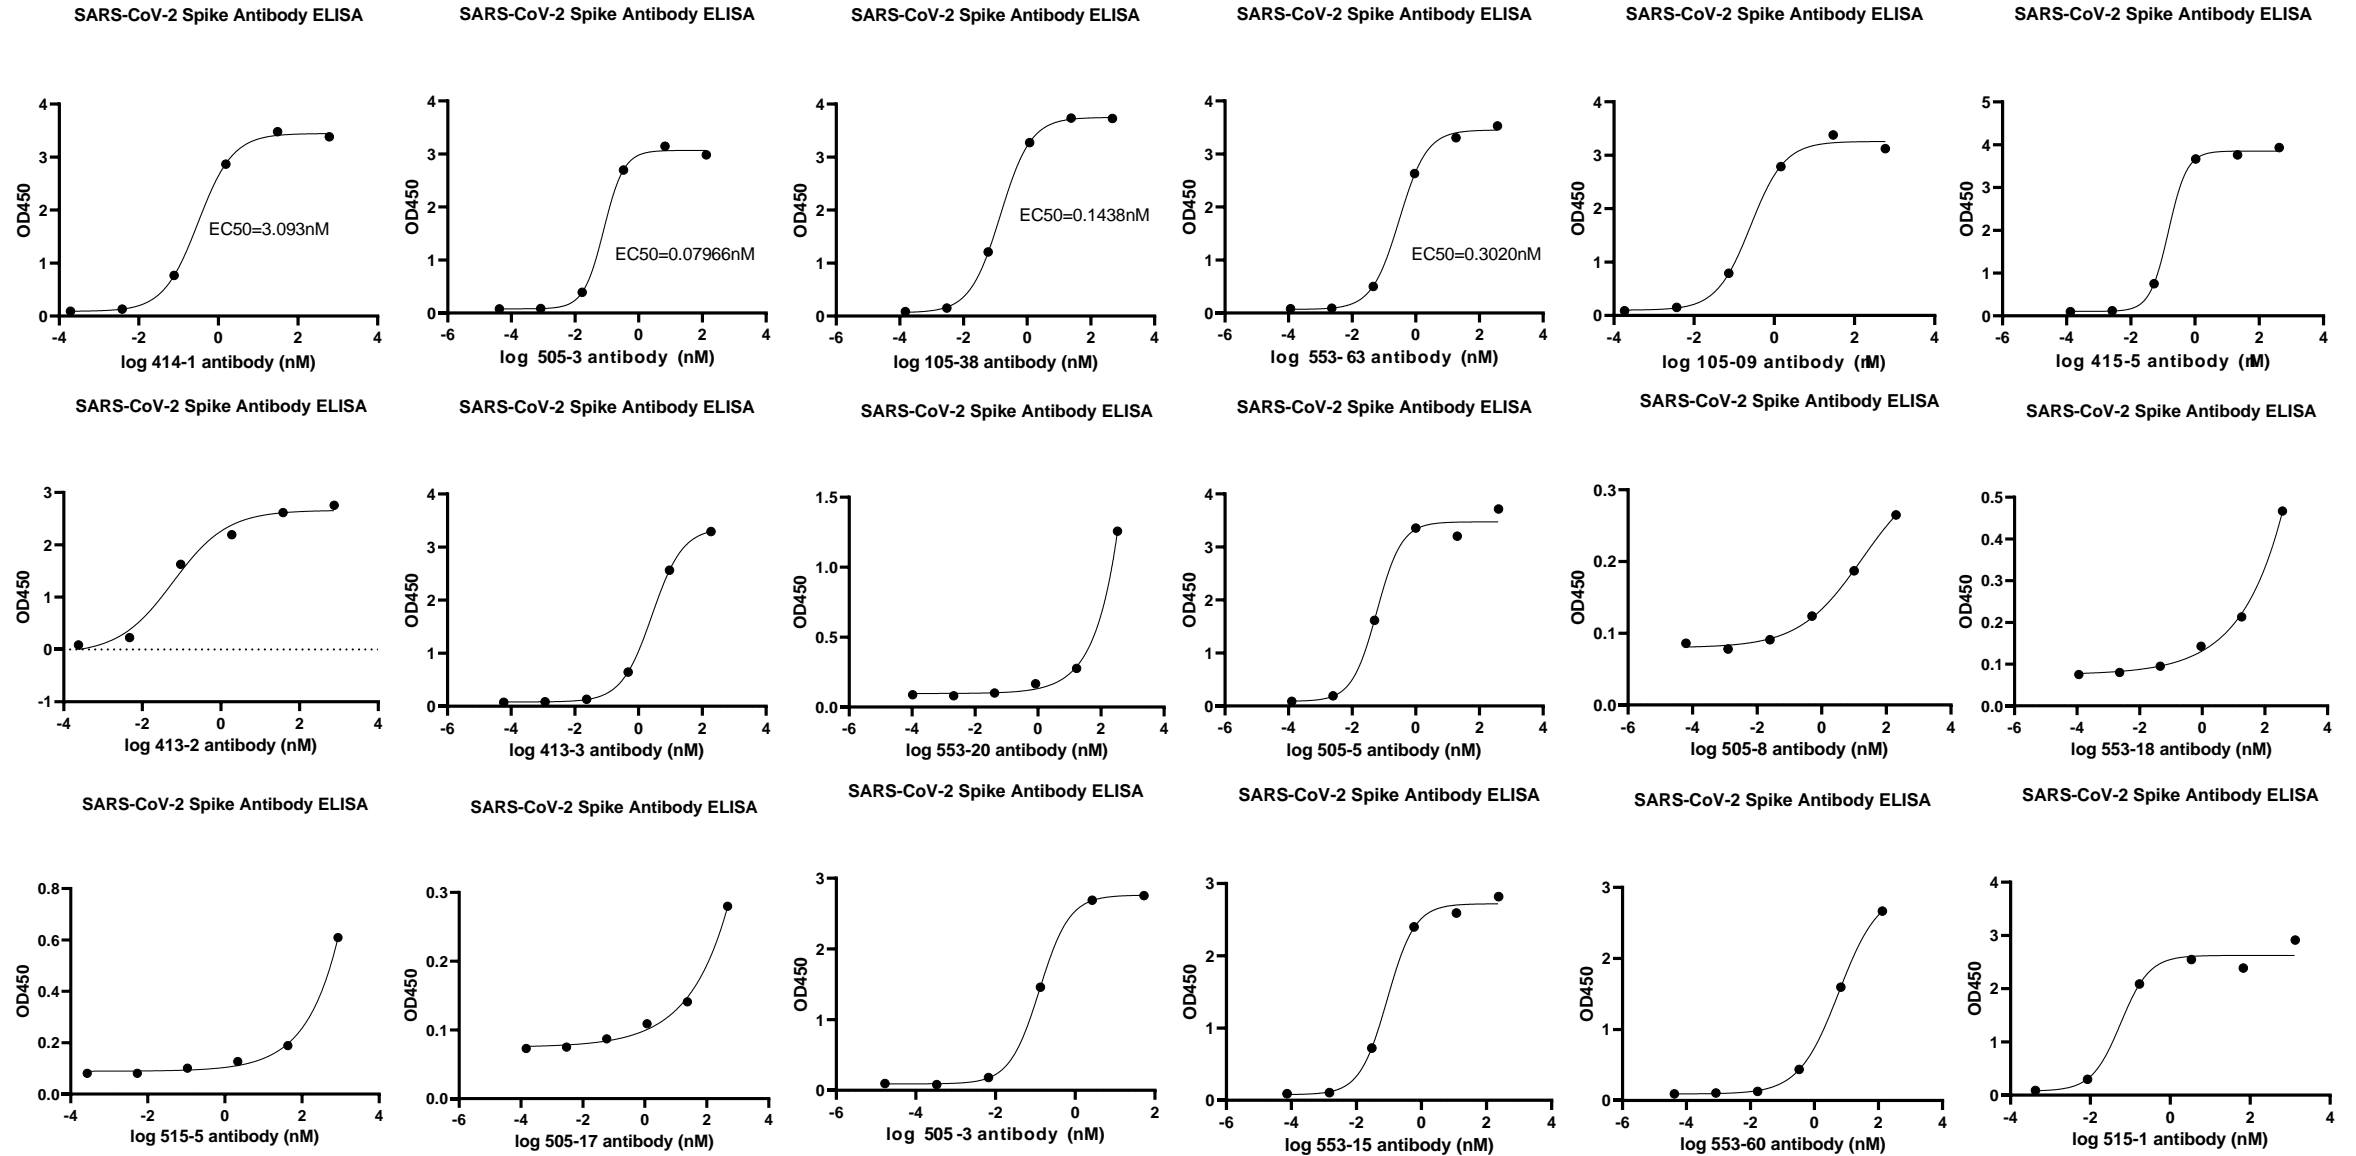

To be continued

**Fig. S1**

SARS-CoV-2 Spike Antibody ELISA

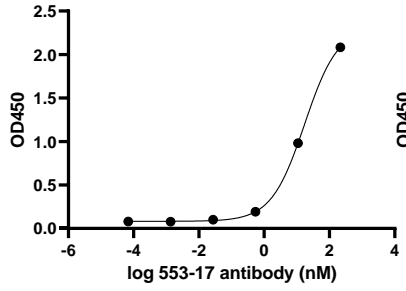

SARS-CoV-2 Spike Antibody ELISA

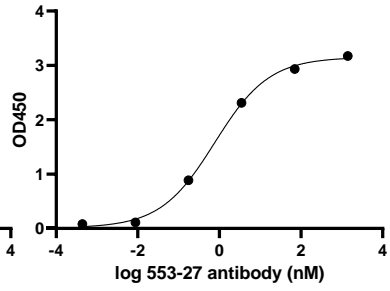

SARS-CoV-2 Spike Antibody ELISA

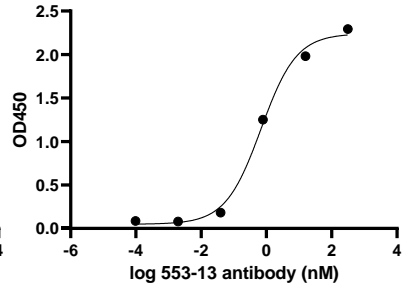

SARS-CoV-2 Spike Antibody ELISA

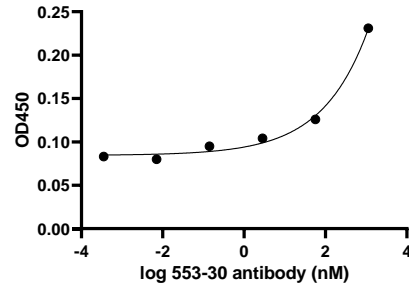

SARS-CoV-2 Spike Antibody ELISA

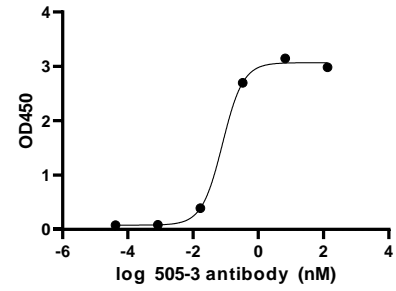

SARS-CoV-2 Spike Antibody ELISA

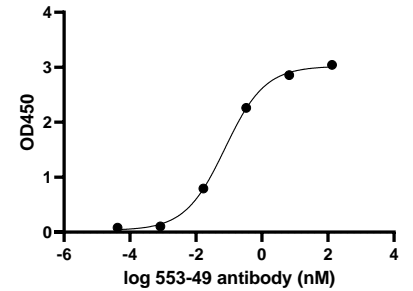

SARS-CoV-2 Spike Antibody ELISA

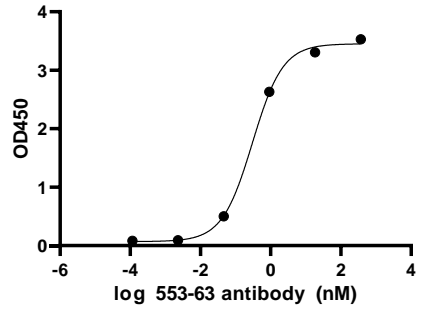

**Fig. S2**

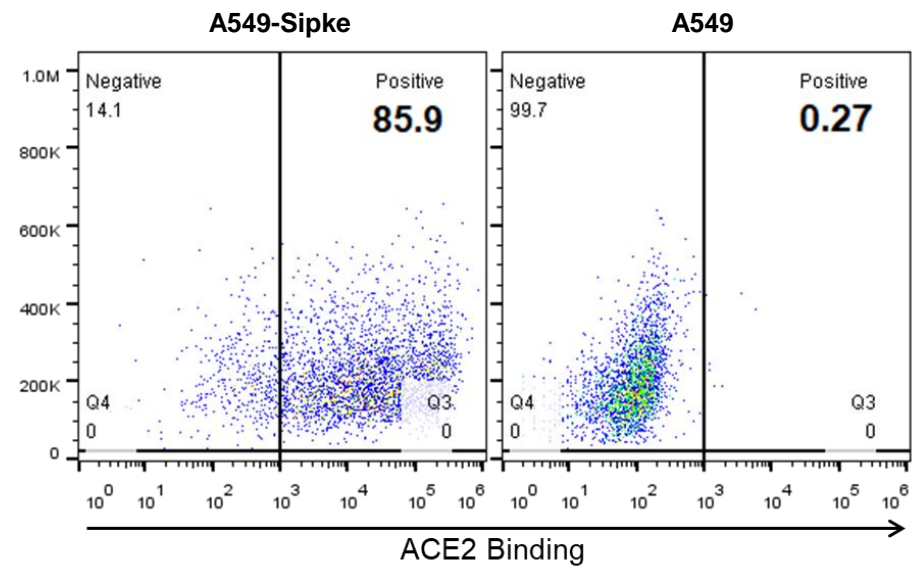

**Fig. S3**

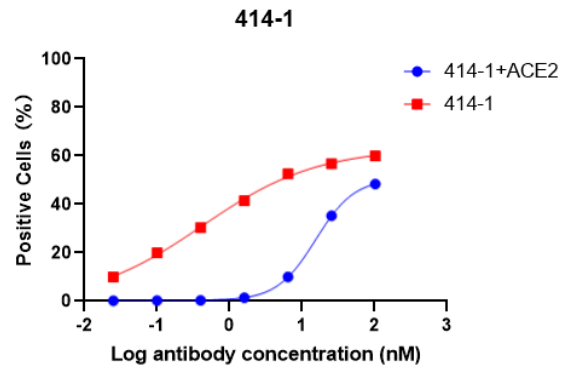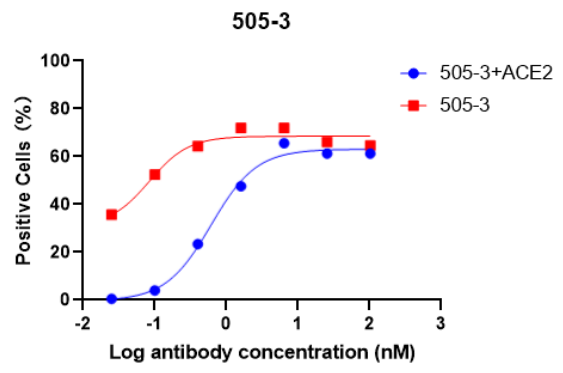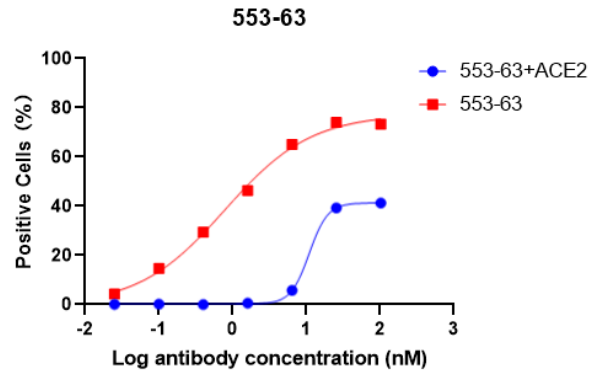

**Fig. S4**

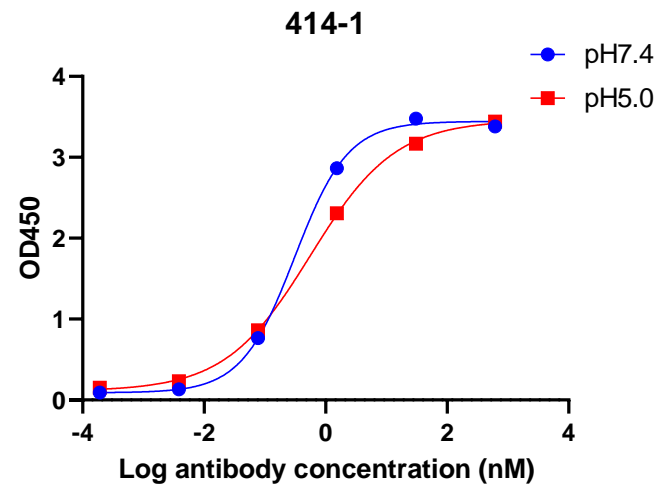

Source: https://www.biorxiv.org/content/biorxiv/early/2020/05/21/2020.05.19.104117.full.pdf
